# Supplementary material for: Robustness of the long short-term memory network in rainfall-runoff prediction improved by the water balance constraint
Source: Copernicus journal article supplement (doi:10.5194/egusphere-2024-1449), 2024-05-30

## Model training and testing

For each of the 531 catchments: different amounts of training data and the same testing data

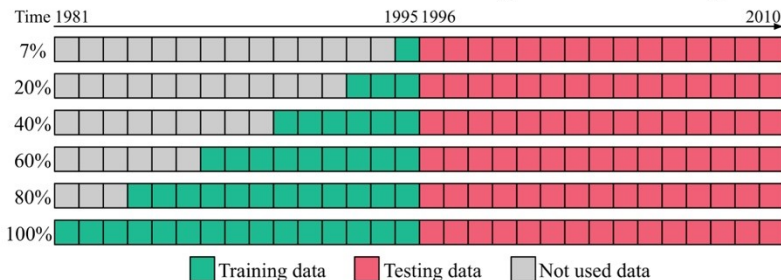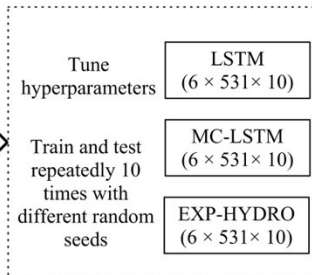

## Experiment 1: Robustness against data sparsity

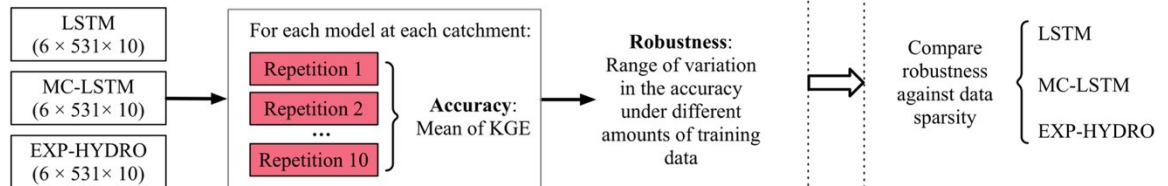

## Experiment 2: Robustness against parameter initialization

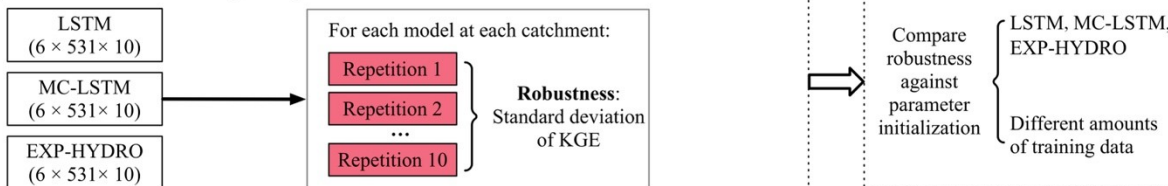

## Experiment 3: Robustness in learning rainfall-runoff relationships

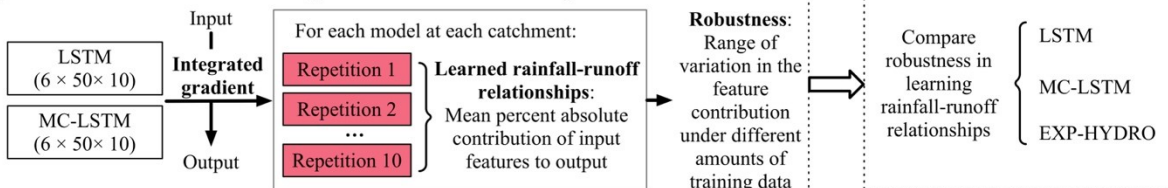

Supplement: Supplementary file [file egusphere-2024-1449-AC2-supplement.pdf]
