# Supplementary material for: Robustness of the long short-term memory network in rainfall-runoff prediction improved by the water balance constraint
Source: Copernicus journal article supplement (doi:10.5194/egusphere-2024-1449), 2024-05-30

### For each of the 531 catchments:

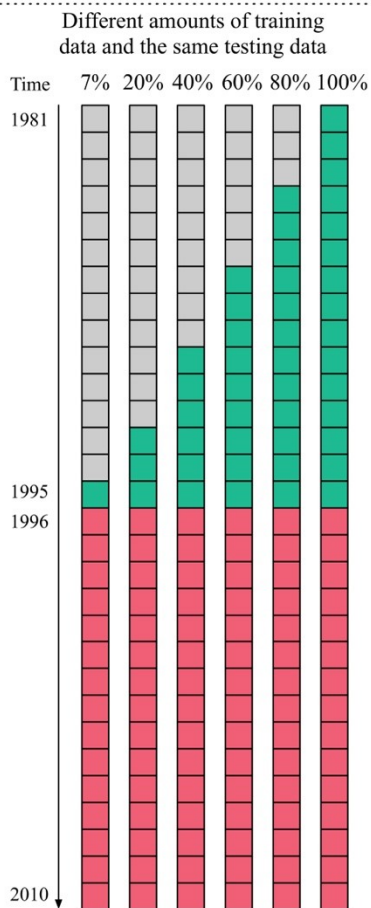

### Experiment 1: Robustness against data sparsity

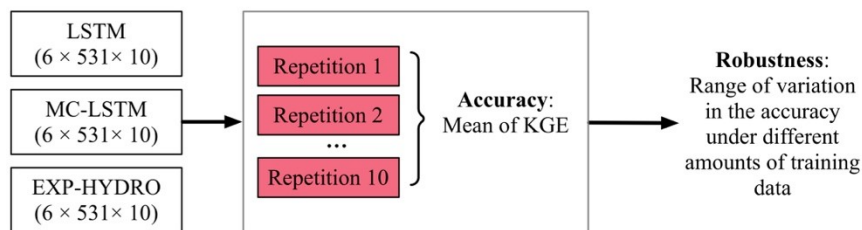

### Experiment 2: Robustness against parameter initialization

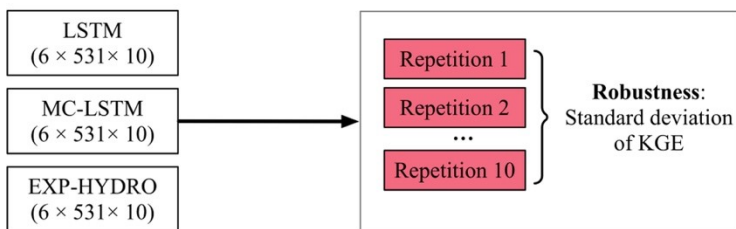

### Experiment 3: Robustness in learning rainfall-runoff relationships

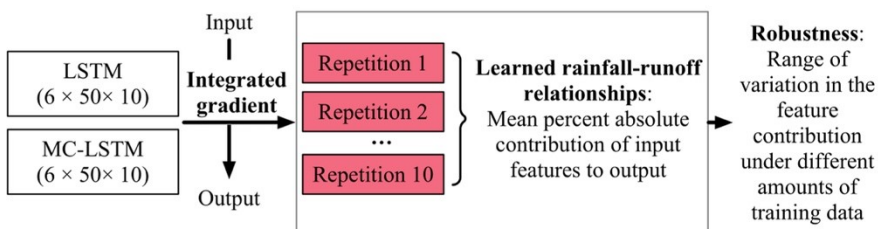

### Experiment 4: Robustness against contrasting climate conditions

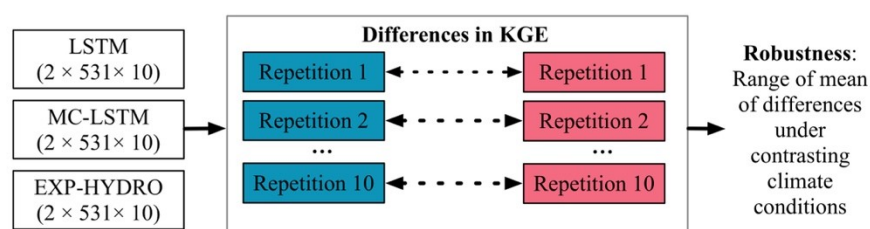

### Experiment 5: Relationships between robustness and catchment attributes

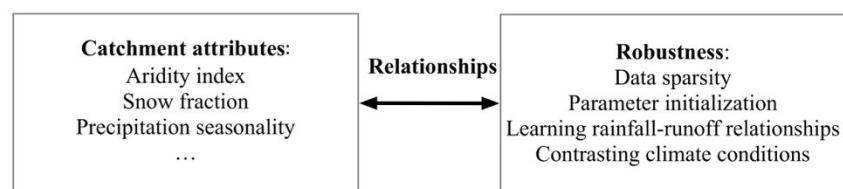

### Two scenarios of contrasting climate conditions

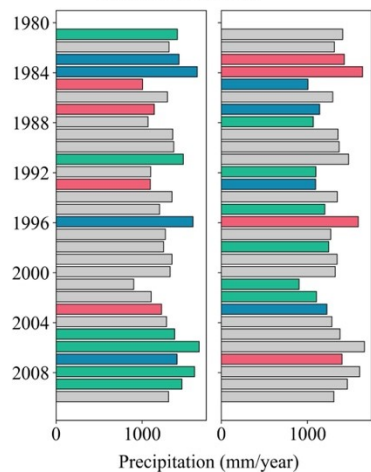

Supplement: Supplementary file [file egusphere-2024-1449-AC3-supplement.pdf]
